# Supplementary material for: Theoretical study of electrochemical reduction of CO2 to CO using a nickel-N4-Schiff base complex
Source: Royal Society of Chemistry journal article supplement (doi:10.1039/d4cp02521k), 2024-01-01
Supplement: d4cp02521k1.pdf [file d4cp02521k1.pdf]

## Supplementary Information

# **THEORETICAL STUDY OF ELECTROCHEMICAL REDUCTION OF CO<sub>2</sub> TO CO USING NICKEL-N<sub>4</sub>-SCHIFF BASE COMPLEX**

*Wilasinee Santiwarodom<sup>1</sup>, Pavee Apilardmongkol<sup>1</sup>, Thanawit Kuamit<sup>1</sup> and Vudhichai Parasuk<sup>1\*</sup>*

<sup>1</sup> Department of Chemistry, Faculty of Science,

Chulalongkorn University, Pathumwan, Bangkok 10330 Thailand

\*Corresponding address (Email: [Vudhichai.P@chula.ac.th](mailto:Vudhichai.P@chula.ac.th), +66-22187602)

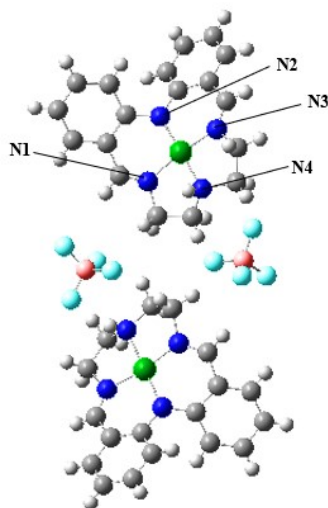

Fig. S1 Example structure of a reaction accelerator from a .cif file

Table S1 Important geometrical parameters for 1-Ni as computed by various methods including CPU time and x-ray structure.

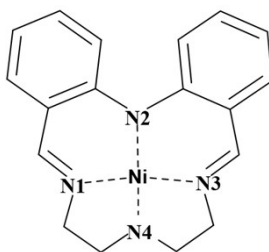

|                             | X-Ray  | M06-2X                 |                    |            |           |
|-----------------------------|--------|------------------------|--------------------|------------|-----------|
|                             |        | LANL2DZ,<br>6-31g(d,p) | SDD,<br>6-31g(d,p) | 6-31g(d,p) | def2-TZVP |
| <b>N1-Ni</b>                | 1.83   | 1.90                   | 1.91               | 1.89       | 1.91      |
| <b>N2-Ni</b>                | 1.87   | 1.90                   | 1.91               | 1.90       | 1.92      |
| <b>N3-Ni</b>                | 1.86   | 1.91                   | 1.91               | 1.90       | 1.92      |
| <b>N4-Ni</b>                | 1.92   | 1.98                   | 1.97               | 1.96       | 1.98      |
| <b>N1-Ni-N3</b>             | 169.83 | 169.25                 | 169.49             | 169.82     | 169.46    |
| <b>N2-Ni-N4</b>             | 179.34 | 178.94                 | 178.47             | 177.78     | 178.22    |
| <b>Jop cpu<br/>time(h.)</b> | -      | 8.06                   | 11.41              | 13.23      | 58.11     |

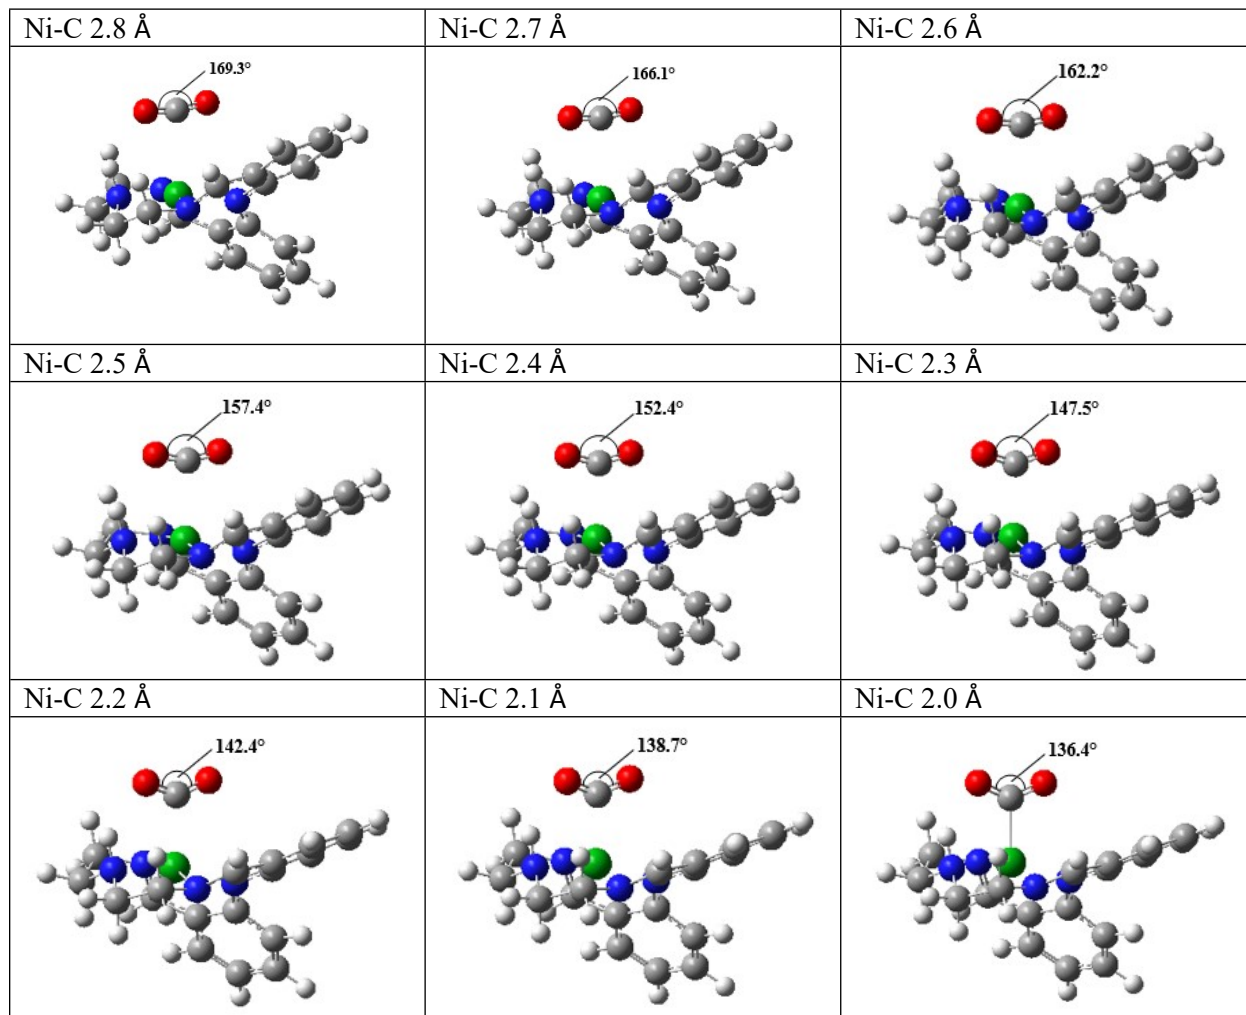

Fig. S2 The distance between the nickel catalyst and the carbon dioxide molecule by considering the distance between Ni of the nickel catalyst and C of the carbon dioxide molecule and the angle of the carbon dioxide structure during adsorption.

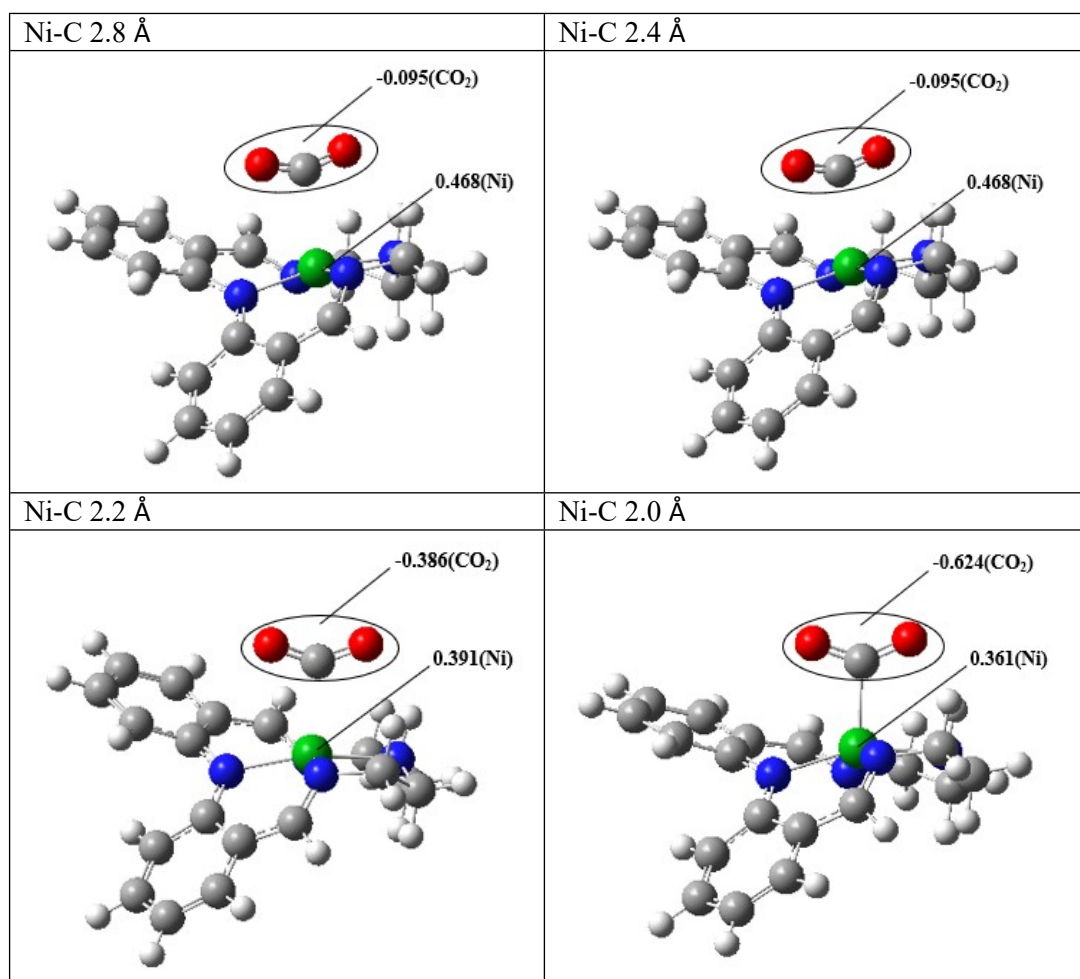

Fig. S3 NBO charges observed during the adsorption of CO<sub>2</sub>.

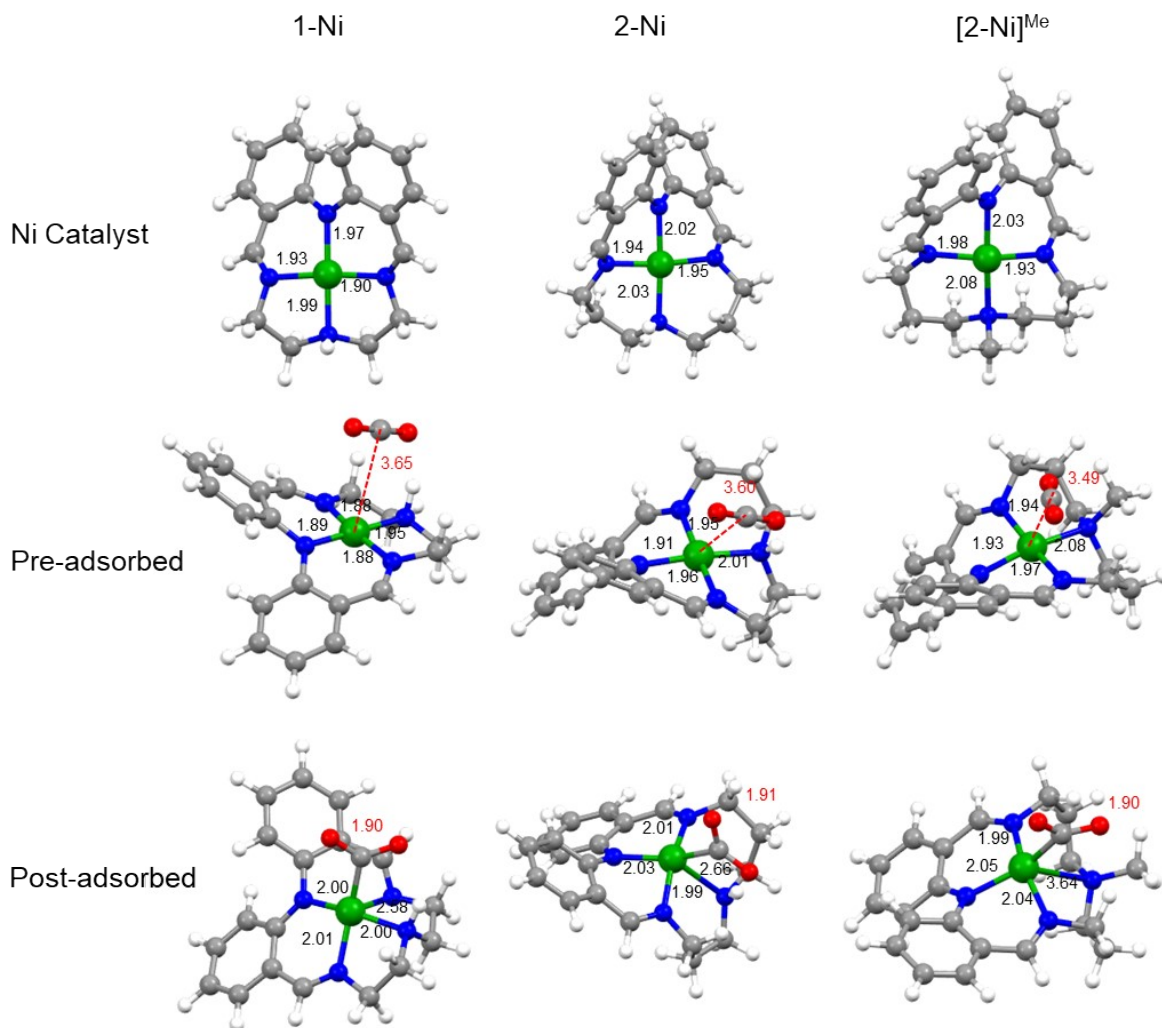

Fig. S4 The structure of Ni catalyst, Pre-adsorbed and Post-adsorbed, with black letters indicating the N-Ni distance and red letters indicating the Ni-C distance of the carbon dioxide molecule in angstrom units.

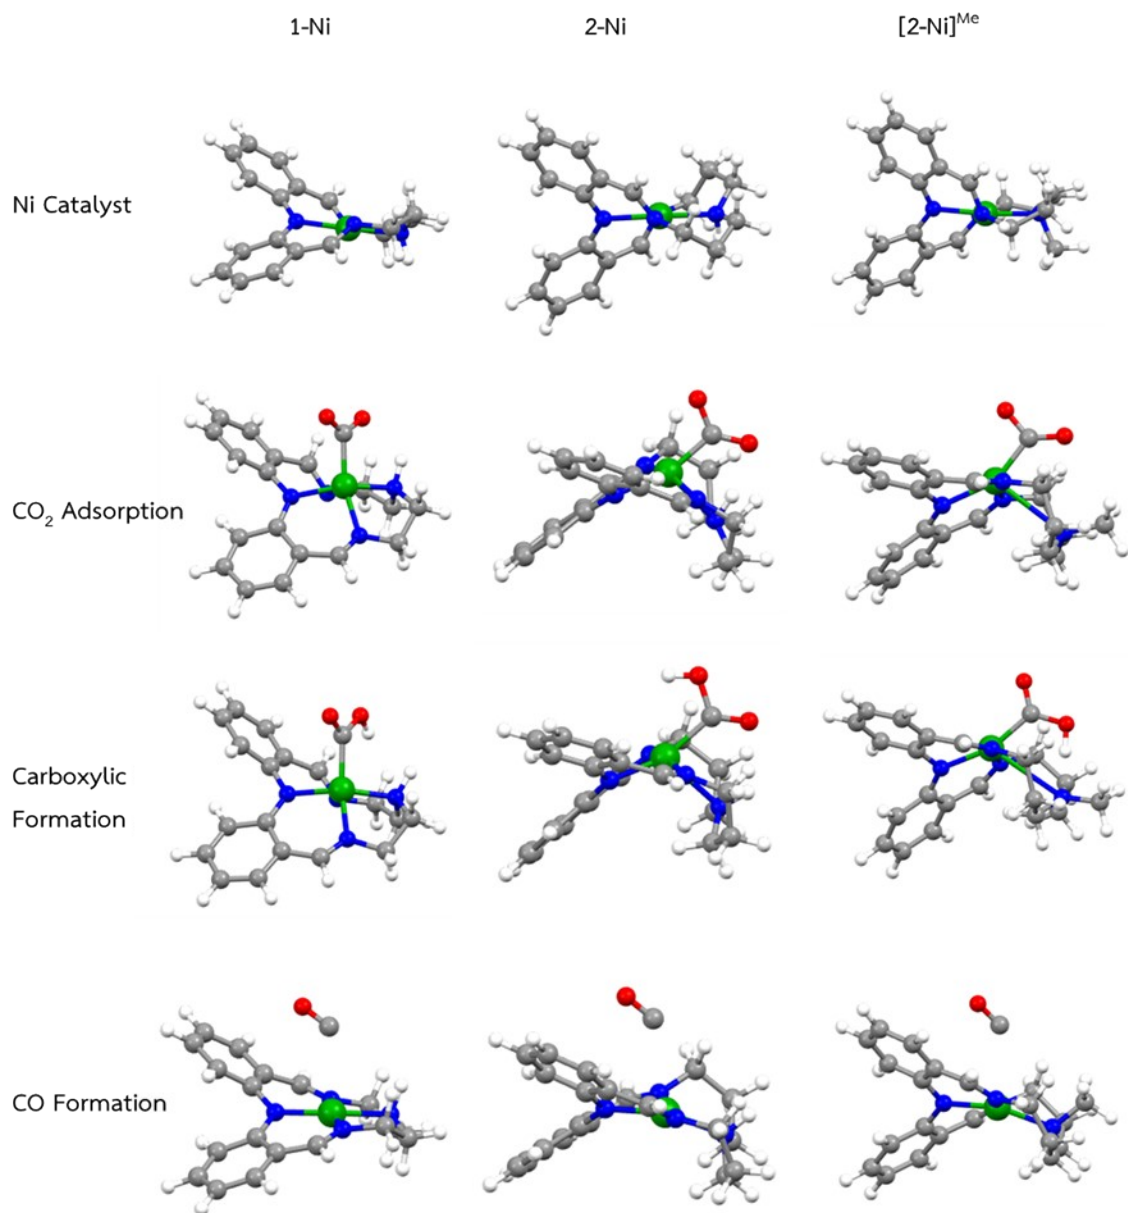

Fig. S5 The arrangement in every stage of the external proton transfer pathway(A).

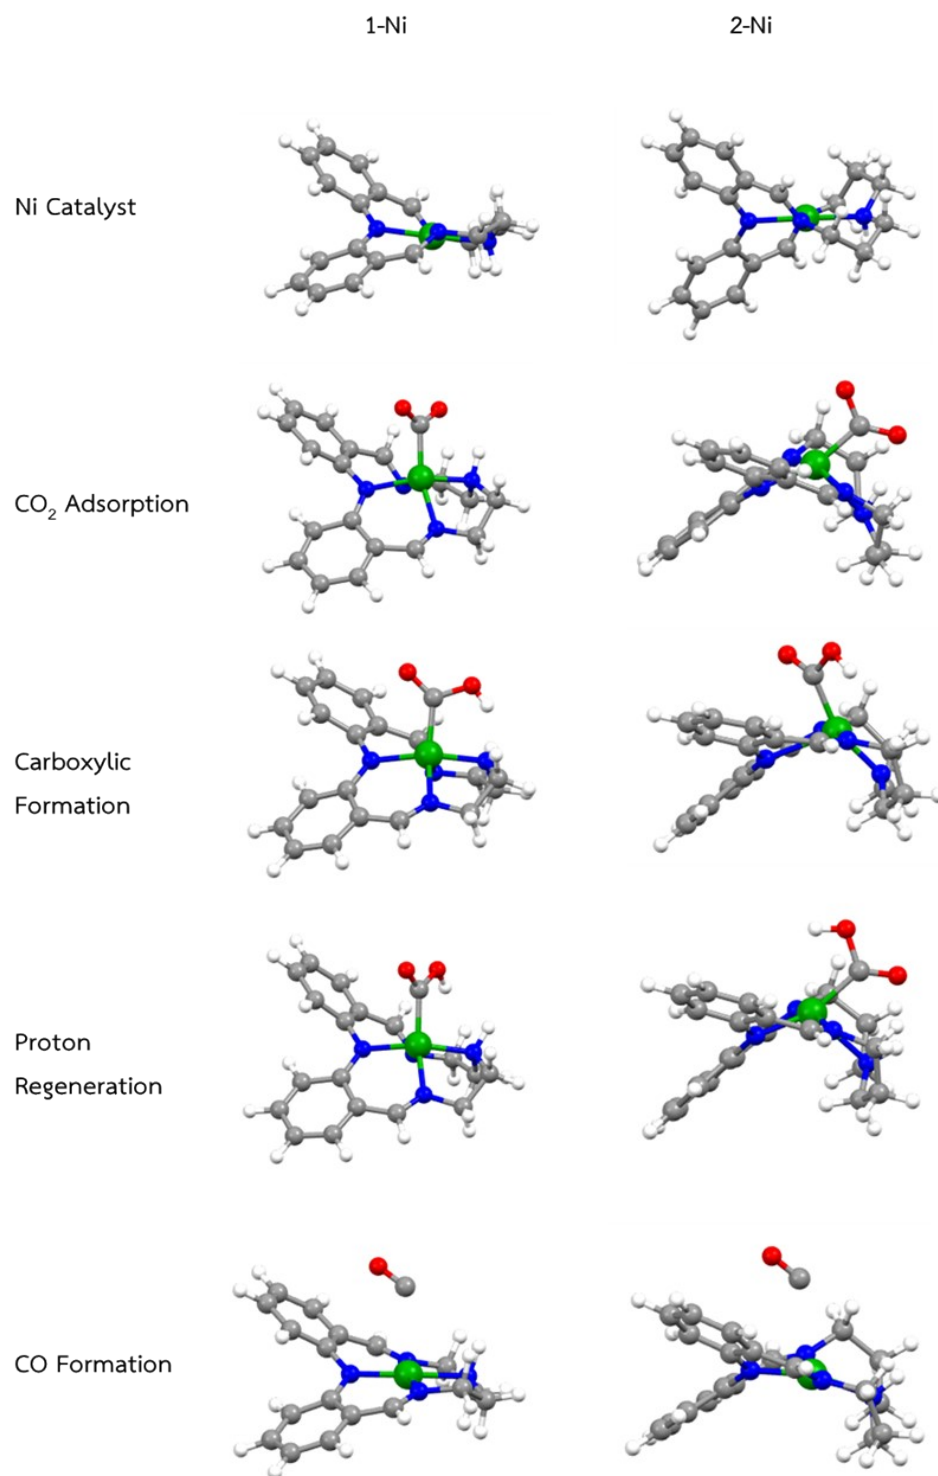

Fig. S6 The arrangement in every stage of the internal proton transfer pathway(B).

S7

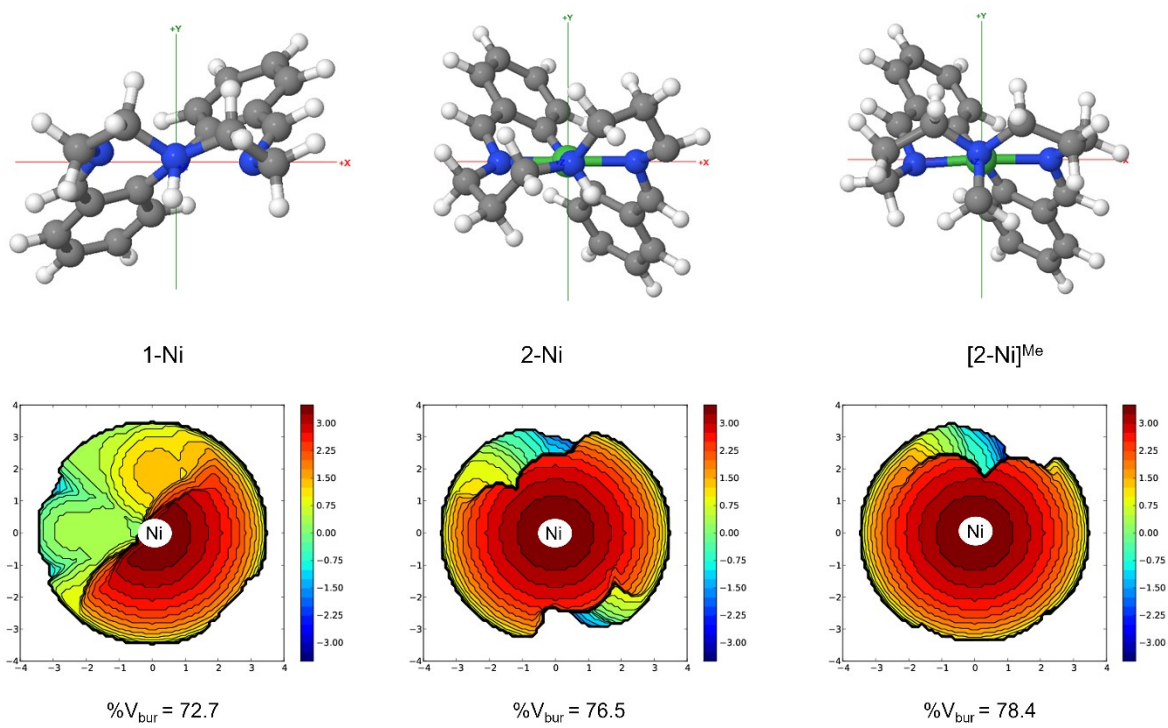

Fig. S7 Topographic steric maps of optimized pre-reaction Ni complex.



# S8

## Example of input file

### 1-Ni (Step A2)

%chk=1A\_1.chk

%mem=5GB

%nprocshared=16

#p opt m062x/genecp scf=(solvent=acetonitrile)  
scf=maxcycle=99999

Title Card Required

-1 1

```
C      2.77814200 -2.89579000 -0.63969200
C      1.72513600 -1.95348100 -0.54555100
C      1.92434400 -0.82886500  0.30315400
C      3.09039200 -0.74966700  1.07296100
C      4.09498000 -1.71126300  0.98791800
C      3.94413500 -2.78314500  0.10247900
H      2.64328100 -3.75131200 -1.29557900
H      3.21437300  0.10286400  1.73411700
H      4.98794900 -1.61769000  1.59748700
H      4.72226500 -3.53390900  0.00823100
C      0.47548000  2.66607600  0.10089100
C      0.95343200  3.94507000 -0.25758300
C      2.18849900  4.13073600 -0.86218700
C      2.97626600  3.01040700 -1.13740600
C      2.55733100  1.73961600 -0.74676000
C      1.33996000  1.54099000 -0.07940200
H      0.30278100  4.79907300 -0.08955900
H      2.52115400  5.12610600 -1.13736600
H      3.93307000  3.12145700 -1.63838500
H      3.20282000  0.89220000 -0.93705200
N      0.95979600  0.25327100  0.42521500
C      0.50047600 -2.32413200 -1.23693000
H      0.56951800 -3.21205300 -1.87078900
C      -0.93564300  2.61034000  0.45785700
H      -1.41671500  3.57489100  0.64417700
N      -0.65878300 -1.75446500 -1.06268400
N      -1.65733100  1.53635200  0.41631100
C      -1.85367500 -2.39524100 -1.63679700
H      -2.17779200 -3.19367900 -0.95612400
H      -1.63662400 -2.85756900 -2.60679800
```

```
C      -2.97587400 -1.35698600 -1.77835500
H      -2.72418900 -0.65632200 -2.58114100
H      -3.91711300 -1.85404600 -2.04850800
C      -3.11650600  1.60754100  0.54464600
H      -3.48655400  2.63657000  0.47192000
H      -3.40055900  1.20227600  1.52210900
C      -3.72417900  0.72984900 -0.56447400
H      -3.51708100  1.18648100 -1.53746900
H      -4.81323700  0.66275400 -0.44743100
N      -3.06282500 -0.58627100 -0.52907400
H      -3.41005800 -1.14780300  0.25053700
Ni     -1.08215000 -0.25964200  0.04222200
O      -0.37091000 -0.49208100  2.67724200
O      -2.39072000 -1.41491700  2.19180000
C      -1.32103600 -0.83147500  1.92101400
```

Ni 0

LANL2DZ

\*\*\*\*

C H O N O

6-31g(d,p)

\*\*\*\*

Ni 0

LANL2DZ

## Reaction coordinates

## 1-Ni (Step A1)

|    |             |             |             |
|----|-------------|-------------|-------------|
| C  | 1.37540000  | -3.49840000 | -0.77550000 |
| C  | 0.82860000  | -2.20680000 | -0.73590000 |
| C  | 1.48220000  | -1.19540000 | 0.01670000  |
| C  | 2.64880000  | -1.56510000 | 0.71390000  |
| C  | 3.18810000  | -2.84010000 | 0.63680000  |
| C  | 2.55770000  | -3.82260000 | -0.12840000 |
| H  | 0.83700000  | -4.26550000 | -1.32760000 |
| H  | 3.12640000  | -0.81440000 | 1.33610000  |
| H  | 4.09110000  | -3.07470000 | 1.19250000  |
| H  | 2.96360000  | -4.82660000 | -0.18940000 |
| C  | 1.27280000  | 2.53140000  | 0.12690000  |
| C  | 2.18330000  | 3.60820000  | 0.04260000  |
| C  | 3.50410000  | 3.44870000  | -0.31200000 |
| C  | 3.92300000  | 2.15100000  | -0.65720000 |
| C  | 3.07970000  | 1.06930000  | -0.55400000 |
| C  | 1.73230000  | 1.17060000  | -0.06010000 |
| H  | 1.79560000  | 4.60650000  | 0.23460000  |
| H  | 4.17850000  | 4.29460000  | -0.37340000 |
| H  | 4.93330000  | 1.99000000  | -1.02470000 |
| H  | 3.45010000  | 0.09700000  | -0.85210000 |
| N  | 0.94620000  | 0.09520000  | 0.16220000  |
| C  | -0.52430000 | -2.07460000 | -1.32300000 |
| H  | -1.12060000 | -2.99400000 | -1.23420000 |
| C  | -0.11030000 | 2.93080000  | 0.25640000  |
| H  | -0.27810000 | 4.00910000  | 0.38570000  |
| N  | -1.04840000 | -1.01620000 | -1.79470000 |
| N  | -1.12130000 | 2.14870000  | 0.15180000  |
| C  | -2.48570000 | -1.06610000 | -2.02520000 |
| H  | -2.93190000 | -1.97710000 | -1.60240000 |
| H  | -2.69040000 | -1.04150000 | -3.10220000 |
| C  | -3.15010000 | 0.17260000  | -1.41990000 |
| H  | -2.69540000 | 1.05580000  | -1.87800000 |
| H  | -4.21900000 | 0.17510000  | -1.67290000 |
| C  | -2.47960000 | 2.67920000  | 0.14850000  |
| H  | -2.72720000 | 3.01120000  | -0.86710000 |
| H  | -2.58540000 | 3.55040000  | 0.80670000  |
| C  | -3.44370000 | 1.56360000  | 0.58420000  |
| H  | -4.46600000 | 1.80160000  | 0.26150000  |
| H  | -3.43800000 | 1.47430000  | 1.67370000  |
| N  | -2.97180000 | 0.27900000  | 0.04090000  |
| H  | -3.38010000 | -0.53550000 | 0.50320000  |
| Ni | -1.02580000 | 0.16700000  | 0.49670000  |
| O  | -0.54880000 | -1.67860000 | 2.43150000  |
| O  | -2.26250000 | -2.22000000 | 1.07620000  |
| C  | -1.29320000 | -1.48470000 | 1.43840000  |

## 1-Ni (Step A2)

|   |             |             |             |
|---|-------------|-------------|-------------|
| C | 1.37540000  | -3.49840000 | -0.77550000 |
| C | 0.82860000  | -2.20680000 | -0.73590000 |
| C | 1.48220000  | -1.19540000 | 0.01670000  |
| C | 2.64880000  | -1.56510000 | 0.71390000  |
| C | 3.18810000  | -2.84010000 | 0.63680000  |
| C | 2.55770000  | -3.82260000 | -0.12840000 |
| H | 0.83700000  | -4.26550000 | -1.32760000 |
| H | 3.12640000  | -0.81440000 | 1.33610000  |
| H | 4.09110000  | -3.07470000 | 1.19250000  |
| H | 2.96360000  | -4.82660000 | -0.18940000 |
| C | 1.27280000  | 2.53140000  | 0.12690000  |
| C | 2.18330000  | 3.60820000  | 0.04260000  |
| C | 3.50410000  | 3.44870000  | -0.31200000 |
| C | 3.92300000  | 2.15100000  | -0.65720000 |
| C | 3.07970000  | 1.06930000  | -0.55400000 |
| C | 1.73230000  | 1.17060000  | -0.06010000 |
| H | 1.79560000  | 4.60650000  | 0.23460000  |
| H | 4.17850000  | 4.29460000  | -0.37340000 |
| H | 4.93330000  | 1.99000000  | -1.02470000 |
| H | 3.45010000  | 0.09700000  | -0.85210000 |
| N | 0.94620000  | 0.09520000  | 0.16220000  |
| C | -0.52430000 | -2.07460000 | -1.32300000 |
| H | -1.12060000 | -2.99400000 | -1.23420000 |
| C | -0.11030000 | 2.93080000  | 0.25640000  |
| H | -0.27810000 | 4.00910000  | 0.38570000  |
| N | -1.04840000 | -1.01620000 | -1.79470000 |
| N | -1.12130000 | 2.14870000  | 0.15180000  |
| C | -2.48570000 | -1.06610000 | -2.02520000 |
| H | -2.93190000 | -1.97710000 | -1.60240000 |
| H | -2.69040000 | -1.04150000 | -3.10220000 |
| C | -3.15010000 | 0.17260000  | -1.41990000 |

|    |             |             |             |
|----|-------------|-------------|-------------|
| H  | -2.69540000 | 1.05580000  | -1.87800000 |
| H  | -4.21900000 | 0.17510000  | -1.67290000 |
| C  | -2.47960000 | 2.67920000  | 0.14850000  |
| H  | -2.72720000 | 3.01120000  | -0.86710000 |
| H  | -2.58540000 | 3.55040000  | 0.80670000  |
| C  | -3.44370000 | 1.56360000  | 0.58420000  |
| H  | -4.46600000 | 1.80160000  | 0.26150000  |
| H  | -3.43800000 | 1.47430000  | 1.67370000  |
| N  | -2.97180000 | 0.27900000  | 0.04090000  |
| H  | -3.38010000 | -0.53550000 | 0.50320000  |
| Ni | -1.02580000 | 0.16700000  | 0.49670000  |
| O  | -0.54880000 | -1.67860000 | 2.43150000  |
| O  | -2.26250000 | -2.22000000 | 1.07620000  |
| C  | -1.29320000 | -1.48470000 | 1.43840000  |

## 1-Ni (Step A3)

|    |             |             |             |
|----|-------------|-------------|-------------|
| C  | 1.54970000  | 3.37610000  | 0.91230000  |
| C  | 0.93680000  | 2.11340000  | 0.84810000  |
| C  | 1.48750000  | 1.11830000  | -0.00410000 |
| C  | 2.60590000  | 1.47250000  | -0.77800000 |
| C  | 3.20530000  | 2.71960000  | -0.68390000 |
| C  | 2.68510000  | 3.68340000  | 0.18110000  |
| H  | 1.10210000  | 4.13250000  | 1.52210000  |
| H  | 2.99890000  | 0.73090000  | -1.46620000 |
| H  | 4.07030000  | 2.94620000  | -1.29920000 |
| H  | 3.14100000  | 4.66400000  | 0.25880000  |
| C  | 1.15250000  | -2.59450000 | -0.09400000 |
| C  | 2.01220000  | -3.71280000 | 0.00880000  |
| C  | 3.34440000  | -3.59590000 | 0.32660000  |
| C  | 3.83140000  | -2.30530000 | 0.60580000  |
| C  | 3.03550000  | -1.18950000 | 0.49070000  |
| C  | 1.67000000  | -1.25700000 | 0.05390000  |
| H  | 1.57670000  | -4.69730000 | -0.14470000 |
| H  | 3.98450000  | -4.46660000 | 0.40290000  |
| H  | 4.86040000  | -2.17730000 | 0.93040000  |
| H  | 3.45950000  | -0.22510000 | 0.73690000  |
| N  | 0.90880000  | -0.15930000 | -0.15770000 |
| C  | -0.36300000 | 2.01560000  | 1.54070000  |
| H  | -0.78690000 | 2.99410000  | 1.82210000  |
| H  | -0.24270000 | -2.91410000 | -0.21770000 |
| C  | -0.47890000 | -3.98220000 | -0.28590000 |
| N  | -1.03660000 | 0.94810000  | 1.70450000  |
| N  | -1.21730000 | -2.07440000 | -1.08960000 |
| C  | -2.43640000 | 1.04380000  | 2.08410000  |
| H  | -2.87040000 | 2.02880000  | 1.84900000  |
| H  | -2.54970000 | 0.89290000  | 3.16360000  |
| C  | -3.20430000 | -0.08790000 | 1.39450000  |
| H  | -2.82830000 | -1.02790000 | 1.80270000  |
| H  | -4.27280000 | -0.01730000 | 1.62420000  |
| C  | -2.59590000 | -2.56390000 | -0.20290000 |
| H  | -2.86910000 | -2.90290000 | 0.80240000  |
| H  | -2.71230000 | -3.41970000 | -0.87590000 |
| C  | -3.50760000 | -1.42130000 | -0.65270000 |
| H  | -4.54450000 | -1.61240000 | -0.35510000 |
| H  | -3.46870000 | -1.31680000 | -1.73940000 |
| N  | -3.00650000 | -0.14520000 | -0.08050000 |
| H  | -3.51800000 | 0.62060000  | -0.51650000 |
| Ni | -1.02760000 | -0.14900000 | -0.47340000 |
| O  | -0.51140000 | 1.58950000  | -2.59570000 |
| O  | -1.71830000 | 2.65580000  | -1.10750000 |
| C  | -1.02830000 | 1.52330000  | -1.49770000 |
| H  | -2.05110000 | 2.51690000  | -0.21250000 |

## 1-Ni (Step B3)

|   |             |             |             |
|---|-------------|-------------|-------------|
| C | -1.18531500 | -3.52862200 | 0.82667600  |
| C | -0.71607200 | -2.20992700 | 0.74959100  |
| C | -1.41640000 | -1.26318600 | -0.03865000 |
| C | -2.54849400 | -1.71847700 | -0.73924600 |
| C | -3.01561200 | -3.01963500 | -0.62650500 |
| C | -2.34009000 | -3.93882100 | 0.17692300  |
| H | -0.61095700 | -4.24617900 | 1.40820000  |
| H | -3.05976300 | -1.01641400 | -1.39097200 |
| H | -3.89644600 | -3.32314700 | -1.18416800 |
| H | -2.68979800 | -4.96155300 | 0.26668300  |
| C | -1.42184900 | 2.46394500  | -0.17701600 |
| C | -2.38293700 | 3.49493600  | -0.09673300 |
| C | -3.69814200 | 3.26435700  | 0.23940500  |
| C | -4.05437100 | 1.94435000  | 0.56618700  |
| C | -3.15526100 | 0.90661400  | 0.46798600  |
| C | -1.80858400 | 1.08400500  | 0.00059500  |

|    |             |             |             |
|----|-------------|-------------|-------------|
| H  | -2.04277600 | 4.51234000  | -0.27753600 |
| H  | -4.41618600 | 4.07370000  | 0.29862300  |
| H  | -5.06061400 | 1.72822300  | 0.91561700  |
| H  | -3.48207600 | -0.08441300 | 0.75342200  |
| N  | -0.95194600 | 0.05672700  | -0.21028400 |
| C  | 0.62159900  | -1.96889000 | 1.34427100  |
| H  | 1.31146000  | -2.81902200 | 1.21030100  |
| C  | -0.05783800 | 2.92015700  | -0.29656500 |
| H  | 0.06918500  | 4.00388800  | -0.41439400 |
| N  | 1.03209800  | -0.89881400 | 1.89379500  |
| N  | 0.98763500  | 2.18413600  | -0.19928600 |
| C  | 2.46518300  | -0.80936500 | 2.14670700  |
| H  | 2.99480400  | -1.71160100 | 1.80076200  |
| H  | 2.63290300  | -0.70077300 | 3.22450400  |
| C  | 3.03429200  | 0.43382300  | 1.45228200  |
| H  | 2.50955500  | 1.29934200  | 1.89527000  |
| H  | 4.09277500  | 0.53100400  | 1.75154700  |
| C  | 2.32450600  | 2.78460200  | -0.20902100 |
| H  | 2.53809400  | 3.17379400  | 0.79350600  |
| H  | 2.37603300  | 3.63068500  | -0.90525700 |
| C  | 3.32180100  | 1.66759900  | -0.57863700 |
| H  | 4.33434700  | 1.97308800  | -0.26435100 |
| H  | 3.33924200  | 1.55912500  | -1.67057900 |
| N  | 2.92065000  | 0.39114300  | -0.00237600 |
| H  | 3.09353300  | -1.03887700 | -0.80822100 |
| Ni | 1.01957900  | 0.22967600  | -0.44521600 |
| O  | 0.68410800  | -2.14900200 | -2.13467700 |
| O  | 2.72320500  | -1.78591300 | -1.36072900 |
| C  | 1.40699100  | -1.45199000 | -1.43268800 |

## 2-Ni (Step A1)

|   |               |             |             |
|---|---------------|-------------|-------------|
| C | 1.50360000    | -3.70080000 | -0.48240000 |
| C | 0.93720000    | -2.46950000 | -0.02160000 |
| C | 1.64120000    | -1.23320000 | -0.32570000 |
| C | 2.86990000    | -1.34400000 | -1.05070000 |
| C | 3.37900000    | -2.54950000 | -1.46400000 |
| C | 2.68590000    | -3.76060000 | -1.16720000 |
| H | 0.96380000    | -4.61830000 | -0.25110000 |
| H | 3.38430000    | -0.42130000 | -1.30610000 |
| H | 4.29760000    | -2.57810000 | -2.04310000 |
| H | 3.09010000    | -4.71540000 | -1.48950000 |
| C | 1.22540000    | 2.39250000  | 0.06000000  |
| C | 1.96430000    | 3.53220000  | 0.52580000  |
| C | 3.19130000    | 3.42840000  | 1.12070000  |
| C | 3.76540000    | 2.14090000  | 1.32970000  |
| C | 3.08270000    | 1.01840000  | 0.91990000  |
| C | 1.81490000    | 1.07790000  | 0.27290000  |
| H | 1.51880000    | 4.51430000  | 0.37080000  |
| H | 3.72160000    | 4.32080000  | 1.44140000  |
| H | 4.71960000    | 2.04280000  | 1.83870000  |
| H | 3.49840000    | 0.03350000  | 1.11800000  |
| N | 1.08810000    | -0.04110000 | -0.00680000 |
| C | -0.23650000   | -2.50540000 | 0.74840000  |
| H | -0.65270000   | -3.50060000 | 0.95800000  |
| C | 0.00260000    | 2.58100000  | -0.59110000 |
| H | -0.36850000   | 3.16230000  | -0.65560000 |
| N | -0.87730000   | -1.44080000 | 1.24800000  |
| N | -0.73660000   | 1.59930000  | -1.16630000 |
| C | -2.97830000   | -0.65640000 | 2.30720000  |
| H | -2.51850000   | 0.29510000  | 2.60620000  |
| H | -3.69190000   | -0.92530000 | 3.09230000  |
| C | -3.72800000   | -0.47480000 | 0.99510000  |
| H | -3.90680000   | -1.45690000 | 0.54280000  |
| H | -4.70790000   | -0.00620000 | 1.15620000  |
| C | -2.73510000</ |             |             |

### 2-Ni (Step A2)

|    |             |             |             |
|----|-------------|-------------|-------------|
| C  | 0.92470000  | 3.96210000  | 0.11290000  |
| C  | 0.62370000  | 2.61630000  | -0.17810000 |
| C  | 1.54640000  | 1.58670000  | 0.17900000  |
| C  | 2.73010000  | 2.00590000  | 0.85220000  |
| C  | 2.98890000  | 3.33200000  | 1.13040000  |
| C  | 2.08700000  | 4.33920000  | 0.75520000  |
| H  | 0.20430000  | 4.72120000  | -0.18330000 |
| H  | 3.43340000  | 1.24660000  | 1.17650000  |
| H  | 3.90100000  | 3.59210000  | 1.66050000  |
| H  | 2.29200000  | 5.38150000  | 0.97060000  |
| C  | 2.09740000  | -1.99820000 | 0.25620000  |
| C  | 3.13490000  | -2.93100000 | 0.10130000  |
| C  | 4.31970000  | -2.60610000 | -0.53540000 |
| C  | 4.47840000  | -1.29850000 | -1.01160000 |
| C  | 3.48550000  | -0.35180000 | -0.83620000 |
| C  | 2.26010000  | -0.65290000 | -0.18790000 |
| H  | 2.98380000  | -3.93600000 | 0.48820000  |
| H  | 5.10310000  | -3.34440000 | -0.66260000 |
| H  | 5.38990000  | -1.01830000 | -1.53170000 |
| H  | 3.62960000  | 0.65330000  | -1.21910000 |
| N  | 1.24990000  | 0.27680000  | -0.04930000 |
| H  | -0.64220000 | 2.40490000  | -0.86200000 |
| H  | -1.15840000 | 3.34160000  | -1.10840000 |
| C  | 0.90510000  | -2.43790000 | 0.97350000  |
| H  | 1.04980000  | -3.23690000 | 1.71120000  |
| N  | -1.22570000 | 1.30720000  | -1.18720000 |
| N  | -0.26300000 | -1.94580000 | 0.80700000  |
| C  | -3.73720000 | 1.10680000  | -0.87530000 |
| H  | -4.06400000 | 0.08680000  | -1.08990000 |
| H  | -4.56090000 | 1.77580000  | -1.14410000 |
| C  | -3.50220000 | 1.19750000  | 0.63660000  |
| H  | -3.03170000 | 2.15650000  | 0.90310000  |
| H  | -4.49070000 | 1.18480000  | 1.13030000  |
| C  | -1.59340000 | -1.26730000 | 2.79570000  |
| H  | -1.80780000 | -1.75300000 | 3.75330000  |
| H  | -0.66740000 | -0.69630000 | 2.92720000  |
| C  | -2.74150000 | -0.30530000 | 2.45960000  |
| H  | -2.66210000 | 0.58080000  | 3.10140000  |
| H  | -3.71020000 | -0.78040000 | 2.70410000  |
| N  | -2.66020000 | 0.09430000  | 1.07010000  |
| H  | -2.87890000 | -0.71550000 | 0.48320000  |
| Ni | -0.58720000 | -0.47450000 | -0.49680000 |
| C  | -2.54480000 | 1.46000000  | -1.80390000 |
| H  | -2.65700000 | 2.49610000  | -2.14900000 |
| H  | -2.57270000 | 0.80430000  | -2.67680000 |
| C  | -1.31980000 | -2.36280000 | 1.73570000  |
| H  | -1.00650000 | -3.28470000 | 2.24090000  |
| H  | -2.21070000 | -2.57280000 | 1.13780000  |
| O  | -1.49190000 | -1.63870000 | -2.63520000 |
| O  | -2.93750000 | -2.02200000 | -0.95320000 |
| C  | -1.89050000 | -1.50620000 | -1.44620000 |

### 2-Ni (Step A3)

|   |             |             |             |
|---|-------------|-------------|-------------|
| C | -0.98690000 | 3.93670000  | 0.06560000  |
| C | -0.64810000 | 2.58830000  | 0.30190000  |
| C | -1.50610000 | 1.54570000  | -0.14010000 |
| C | -2.67400000 | 1.93910000  | -0.84620000 |
| C | -2.97650000 | 3.26650000  | -1.07270000 |
| C | -2.13610000 | 4.29100000  | -0.60940000 |
| H | -0.30980000 | 4.70720000  | 0.42560000  |
| H | -3.33050000 | 1.16640000  | -1.23110000 |
| H | -3.87390000 | 3.51520000  | -1.63140000 |
| H | -2.37780000 | 5.33210000  | -0.78820000 |
| C | -2.06130000 | -2.03920000 | -0.21520000 |
| C | -3.10980000 | -2.95960000 | -0.04640000 |
| C | -4.28070000 | -2.61070000 | 0.59890000  |
| C | -4.41200000 | -1.29790000 | 1.07140000  |
| C | -3.40650000 | -0.36760000 | 0.88450000  |
| C | -2.19540000 | -0.69400000 | 0.22430000  |
| H | -2.97590000 | -3.96830000 | -0.42870000 |
| H | -5.07570000 | -3.33400000 | 0.73790000  |
| H | -5.31310000 | -1.00070000 | 1.59950000  |
| H | -3.53310000 | 0.64030000  | 1.26480000  |
| N | -1.17700000 | 0.23090000  | 0.06270000  |
| C | 0.60520000  | 2.36650000  | 0.98820000  |
| H | 1.10580000  | 3.28820000  | 1.30550000  |
| C | -0.88020000 | -2.48610000 | -0.92870000 |
| H | -1.00340000 | -3.33070000 | -1.61520000 |
| N | 1.22040000  | 1.25760000  | 1.21060000  |
| N | 0.27500000  | -1.94990000 | -0.80600000 |
| C | 3.65480000  | 1.36960000  | 0.57360000  |
| H | 4.25070000  | 0.45720000  | 0.67260000  |
| H | 4.33520000  | 2.21320000  | 0.71870000  |
| C | 3.11050000  | 1.41410000  | -0.85720000 |
| H | 2.33720000  | 2.18680000  | -0.95920000 |

|    |            |             |             |
|----|------------|-------------|-------------|
| H  | 3.92590000 | 1.69930000  | -1.54260000 |
| C  | 1.61380000 | -1.43990000 | -2.85150000 |
| H  | 2.50840000 | -1.81240000 | -3.36300000 |
| H  | 0.78740000 | -1.50320000 | -3.56670000 |
| C  | 1.82340000 | 0.03020000  | -2.46190000 |
| H  | 0.84870000 | 0.52640000  | -2.34530000 |
| H  | 2.34540000 | 0.54200000  | -3.28760000 |
| N  | 2.52520000 | 0.13050000  | -1.19550000 |
| H  | 3.21470000 | -0.60670000 | -1.07240000 |
| Ni | 0.65080000 | -0.45900000 | 0.41560000  |
| C  | 2.59160000 | 1.40560000  | 1.71330000  |
| H  | 2.66870000 | 2.35980000  | 2.24550000  |
| H  | 2.78180000 | 0.61100000  | 2.43450000  |
| C  | 1.35440000 | -2.40360000 | -1.68240000 |
| H  | 1.10680000 | -3.39030000 | -2.09080000 |
| H  | 2.24960000 | -2.50110000 | -1.06660000 |
| O  | 3.18070000 | -1.90860000 | 0.87400000  |
| O  | 1.89050000 | -1.77000000 | 2.63780000  |
| C  | 2.11940000 | -1.48920000 | 1.30210000  |
| H  | 1.03270000 | -1.39460000 | 2.87650000  |

### 2-Ni (Step B3)

|    |             |             |             |
|----|-------------|-------------|-------------|
| C  | 1.51458400  | 3.89975300  | 0.06363300  |
| C  | 1.02605100  | 2.59148300  | -0.17793200 |
| C  | 1.78638100  | 1.45626000  | 0.25279100  |
| C  | 2.97682300  | 1.73275300  | 0.98848000  |
| C  | 3.41457300  | 3.02280100  | 1.22590900  |
| C  | 2.69341500  | 4.13188600  | 0.74568500  |
| H  | 0.92117200  | 4.73936700  | -0.29052200 |
| H  | 3.54453900  | 0.90000300  | 1.38692100  |
| H  | 4.32251200  | 3.17567600  | 1.80378400  |
| H  | 3.04220100  | 5.14341400  | 0.92581400  |
| C  | 1.92913300  | -2.18616800 | 0.34283600  |
| C  | 2.89595800  | -3.21198300 | 0.27536600  |
| C  | 4.15403500  | -2.99759900 | -0.26308800 |
| C  | 4.46110500  | -1.71469000 | -0.74499600 |
| C  | 3.54505400  | -0.67876100 | -0.64790900 |
| C  | 2.25489900  | -0.85765200 | -0.07707200 |
| H  | 2.62184200  | -4.19940500 | 0.69323100  |
| H  | 4.87752700  | -3.80395100 | -0.32393700 |
| H  | 5.42704800  | -1.52440000 | -1.20564300 |
| H  | 3.81009600  | 0.30007000  | -1.03174500 |
| N  | 1.33781700  | 0.18065700  | 0.01485800  |
| C  | -0.26648700 | 2.51702300  | -0.80718300 |
| H  | -0.67944800 | 3.49261600  | -1.08570800 |
| C  | 0.62911200  | -2.54205100 | 0.86700200  |
| H  | 0.58874700  | -3.42915300 | 1.50724400  |
| N  | -1.02402500 | 1.48157900  | -1.00978800 |
| N  | -0.47050900 | -1.91550900 | 0.61505600  |
| C  | -3.30648100 | 2.22228600  | -0.25646800 |
| H  | -4.33203100 | 2.28878500  | -0.64568200 |
| H  | -3.02124000 | 3.23352300  | 0.06631200  |
| C  | -3.28575800 | 1.29433500  | 0.96988600  |
| H  | -2.24136200 | 1.33127500  | 1.36720100  |
| H  | -3.87558400 | 1.82296000  | 1.76450100  |
| C  | -2.28564200 | -1.36059400 | 2.28749700  |
| H  | -2.32298600 | -1.82060600 | 3.28340000  |
| H  | -1.60093400 | -0.50918000 | 2.37287100  |
| C  | -3.70351200 | -0.84295600 | 1.88467900  |
| H  | -4.10838200 | -0.33300300 | 2.79488000  |
| H  | -4.33386300 | -1.74328600 | 1.75721400  |
| N  | -3.78813300 | -0.02394200 | 0.70696800  |
| H  | -3.34228600 | -0.79590400 | -0.62924400 |
| Ni | -0.53047700 | -0.31811800 | -0.48293800 |
| C  | -2.40099100 | 1.82223400  | -1.44311600 |
| H  | -2.35644700 | 2.65917700  | -2.15332600 |
| H  | -2.82307000 | 0.97061800  | -1.96634300 |
| H  | -1.69963700 | -2.38428200 | 1.28289000  |
| N  | -1.47908000 | -3.33332400 | 1.78811500  |
| H  | -2.43688800 | -2.58325700 | 0.50212800  |
| O  | -1.27193700 | -1.67868800 | -2.61649700 |
| O  | -3.10228600 | -1.27028500 | -1.41985300 |
| C  | -1.78945000 | -1.17024200 | -1.61956700 |

### [2-Ni]<sup>Me</sup> (Step A1)

|   |             |             |             |
|---|-------------|-------------|-------------|
| C | -1.44680000 | -3.73610000 | 0.61430000  |
| C | -0.94800000 | -2.49730000 | 0.08170000  |
| C | -1.74290000 | -1.30230000 | 0.33310000  |
| C | -2.95130000 | -1.44230000 | 1.06220000  |
| C | -3.40880000 | -2.65830000 | 1.52820000  |
| C | -2.63260000 | -3.82750000 | 1.29260000  |
| H | -0.85230000 | -4.63240000 | 0.43940000  |
| H | -3.51490000 | -0.53620000 | 1.27530000  |
| H | -4.33330000 | -2.71580000 | 2.09450000  |
| H | -2.97650000 | -4.79150000 | 1.65890000  |
| C | -1.50580000 | 2.33500000  | -0.10980000 |

|    |             |             |             |
|----|-------------|-------------|-------------|
| C  | -2.30090000 | 3.43180000  | -0.56120000 |
| C  | -3.49630000 | 3.26480000  | -1.20450000 |
| C  | -3.96580000 | 1.93580000  | -1.44680000 |
| C  | -3.24560000 | 0.85170000  | -0.19192000 |
| C  | -1.98640000 | 0.98230000  | -0.34170000 |
| H  | -1.92860000 | 4.43660000  | -0.36460000 |
| H  | -4.07900000 | 4.11780000  | -1.52960000 |
| H  | -4.89490000 | 1.78350000  | -1.98940000 |
| H  | -3.60130000 | -0.15500000 | -1.22080000 |
| N  | -1.23220000 | -0.07190000 | 0.00670000  |
| C  | 0.23260000  | -2.46550000 | -0.66050000 |
| H  | 0.78500000  | -3.40760000 | -0.77060000 |
| C  | -0.34830000 | 2.60060000  | 0.64800000  |
| H  | -0.16510000 | 3.65560000  | 0.89550000  |
| N  | 0.70390000  | -1.34920000 | -1.29590000 |
| N  | 0.49800000  | 1.69430000  | 1.12540000  |
| C  | 3.17260000  | -1.88020000 | -1.49242000 |
| H  | 3.99370000  | -1.57750000 | -2.15240000 |
| H  | 3.29480000  | -2.95670000 | -1.33070000 |
| C  | 3.32020000  | -1.23280000 | -0.11970000 |
| H  | 2.72800000  | -1.79500000 | 0.61060000  |
| H  | 4.37560000  | -1.29130000 | 0.18870000  |
| C  | 2.90390000  | 2.07660000  | 1.68000000  |
| H  | 3.09890000  | 2.78200000  | 0.86640000  |
| C  | 3.53310000  | 2.39470000  | 2.51890000  |
| C  | 3.33980000  | 0.66820000  | 1.30230000  |
| H  | 2.97510000  | -0.03680000 | 2.05900000  |
| H  | 4.43950000  | 0.61110000  | 1.30620000  |
| N  | 2.86640000  | 0.17780000  | -0.01650000 |
| Ni | 0.78480000  | 0.12860000  | -0.05750000 |
| C  | 1.82080000  | -1.59120000 | -2.18290000 |
| H  | 1.59770000  | -2.43180000 | -2.85710000 |
| H  | 1.93300000  | -0.71570000 | -2.83300000 |
| C  | 1.44620000  | 2.16880000  | 2.11590000  |
| H  | 1.33300000  | 1.57070000  | 3.03320000  |
| H  | 1.22680000  | 3.20980000  | 2.39450000  |
| C  | 3.46820000  | 1.00110000  | -1.07940000 |
| H  | 3.21380000  | 0.59850000  | -0.25702000 |
| H  | 3.07990000  | 2.01780000  | -1.02580000 |
| H  | 4.56350000  | 1.02790000  | -0.97850000 |

### [2-Ni]<sup>Me</sup> (Step A2)

|   |            |             |             |
|---|------------|-------------|-------------|
| C | 1.49330000 | 3.91550000  | -0.09400000 |
| C | 1.02280000 | 2.59960000  | -0.29650000 |
| C | 1.77520000 | 1.48880000  | 0.20080000  |
| C | 2.92490000 | 1.81860000  | 0.97780000  |
| C | 3.35030000 | 3.11600000  | 1.16690000  |
| C | 2.64810000 | 4.19380000  | 0.60560000  |
| H | 0.89950000 | 4.73300000  | -0.49620000 |
| H | 3.47640000 | 1.00920000  | 1.44270000  |
| H | 4.23350000 | 3.29980000  | 1.77230000  |
| H | 2.98360000 | 5.21490000  | 0.74580000  |
| C | 1.99290000 | -2.15520000 | 0.36970000  |
| C | 2.99180000 | -3.14570000 | 0.38090000  |
| C | 4.28300000 | -2.89730000 | -0.04370000 |
| C | 4.58410000 | -1.60860000 | -0.50330000 |
| C | 3.63350000 | -0.60670000 | -0.48320000 |
| C | 2.30810000 | -0.81350000 | -0.0089     |

|   |             |             |             |
|---|-------------|-------------|-------------|
| C | -1.69570000 | -2.61750000 | 0.84200000  |
| H | -1.59890000 | -3.70610000 | 0.95050000  |
| H | -2.44040000 | -2.39070000 | 0.07610000  |
| C | -4.23090000 | -0.30740000 | 1.00500000  |
| H | -4.69570000 | 0.16450000  | 0.13670000  |
| H | -4.27910000 | -1.38600000 | 0.84490000  |
| H | -4.82740000 | -0.05550000 | 1.90330000  |
| C | -1.63760000 | -1.16310000 | -1.95790000 |
| O | -0.85040000 | -1.42620000 | -2.91440000 |
| O | -2.86670000 | -1.40810000 | -1.90610000 |

**[2-Ni]<sup>Me</sup> (Step A3)**

|    |             |             |             |
|----|-------------|-------------|-------------|
| C  | -1.17480000 | 3.94840000  | -0.04810000 |
| C  | -0.85900000 | 2.60420000  | 0.24870000  |
| C  | -1.70060000 | 1.55190000  | -0.21290000 |
| C  | -2.81050000 | 1.93520000  | -1.01560000 |
| C  | -3.08310000 | 3.25560000  | -1.30330000 |
| C  | -2.27070000 | 4.28990000  | -0.80940000 |
| H  | -0.51730000 | 4.72510000  | 0.33410000  |
| H  | -3.44480000 | 1.15750000  | -1.42570000 |
| H  | -3.93530000 | 3.49240000  | -1.93340000 |
| H  | -2.49220000 | 5.32670000  | -1.03340000 |
| C  | -2.25810000 | -2.03520000 | -0.27020000 |
| C  | -3.32400000 | -2.94980000 | -0.20280000 |
| C  | -4.55740000 | -2.58830000 | 0.30300000  |
| C  | -4.73430000 | -1.26900000 | 0.74080000  |
| C  | -3.71110000 | -0.34400000 | 0.64860000  |
| C  | -2.43840000 | -0.68120000 | 0.12570000  |
| H  | -3.15250000 | -3.96590000 | -0.54860000 |
| H  | -5.36510000 | -3.30810000 | 0.36510000  |
| H  | -5.68530000 | -0.96230000 | 1.16580000  |
| H  | -3.87310000 | 0.66920000  | 1.00040000  |
| N  | -1.40700000 | 0.24350000  | 0.06000000  |
| C  | 0.35020000  | 2.40730000  | 1.01180000  |
| H  | 0.81700000  | 3.33760000  | 1.35570000  |
| C  | -1.00560000 | -2.52170000 | -0.81750000 |
| H  | -1.06280000 | -3.39850000 | -1.47150000 |
| N  | 0.97010000  | 1.30740000  | 1.27510000  |
| N  | 0.14060000  | -2.00100000 | -0.58080000 |
| C  | 3.43890000  | 1.68720000  | 0.85800000  |
| H  | 4.28780000  | 1.05670000  | 1.14250000  |
| H  | 3.78270000  | 2.72220000  | 0.94280000  |
| C  | 3.10620000  | 1.46430000  | -0.62060000 |
| H  | 2.15020000  | 1.93870000  | -0.85590000 |
| H  | 3.86300000  | 1.97560000  | -1.23230000 |
| C  | 1.72770000  | -1.59570000 | -2.44970000 |
| H  | 2.59980000  | -2.04440000 | -2.93650000 |
| H  | 0.92990000  | -1.57740000 | -3.20050000 |
| C  | 2.00950000  | -0.14310000 | -2.06870000 |
| H  | 1.08210000  | 0.31640000  | -1.70730000 |
| H  | 2.30400000  | 0.40500000  | -2.97910000 |
| N  | 3.03110000  | 0.04310000  | -1.02380000 |
| Ni | 0.36120000  | -0.44780000 | 0.60790000  |
| C  | 2.29210000  | 1.47870000  | 1.89650000  |
| H  | 2.26190000  | 2.35160000  | 2.55690000  |
| H  | 2.49490000  | 0.61140000  | 2.51920000  |
| C  | 1.30100000  | -2.52520000 | -1.30630000 |
| H  | 1.05950000  | -3.50770000 | -1.72750000 |
| H  | 2.11940000  | -2.65300000 | -0.59620000 |
| C  | 4.34640000  | -0.42520000 | -1.47570000 |
| H  | 5.09520000  | -0.18960000 | -0.71510000 |
| H  | 4.33760000  | -1.50920000 | -1.61250000 |
| H  | 4.64260000  | 0.05320000  | -2.42080000 |
| C  | 1.71790000  | -1.40840000 | 1.59300000  |
| O  | 1.39470000  | -1.99560000 | 2.61510000  |
| O  | 3.01030000  | -1.44820000 | 1.20580000  |
| H  | 3.02790000  | -0.90070000 | 0.35950000  |
